# Supplementary material for: Diel rewiring and positive selection of ancient plant proteins enabled evolution of CAM photosynthesis in Agave
Source: PubMed Central journal article supplement (PMC6090859; doi:10.1186/s12864-018-4964-7), 2018-08-06
Supplement: 12864_2018_4964_MOESM2_ESM.pdf [file 12864_2018_4964_MOESM2_ESM.pdf]

**Table S2.** Biological processes over-represented ( $p < 1E-20$ ) in ortholog clade NVP:C<sub>3</sub>:CAM:C<sub>4</sub> in *Agave americana*. NVP:C<sub>3</sub>:CAM:C<sub>4</sub> represents orthologs shared by C<sub>3</sub>, CAM, C<sub>4</sub> and NVP (i.e. non-vascular plants).

| GO ID | Corrected p-value | Description                                             |
|-------|-------------------|---------------------------------------------------------|
| 44237 | 3.44E-73          | cellular metabolic process                              |
| 44238 | 2.20E-69          | primary metabolic process                               |
| 8152  | 6.80E-66          | metabolic process                                       |
| 44281 | 9.20E-62          | small molecule metabolic process                        |
| 9987  | 3.38E-55          | cellular process                                        |
| 44249 | 5.94E-51          | cellular biosynthetic process                           |
| 9058  | 2.61E-48          | biosynthetic process                                    |
| 9056  | 5.41E-42          | catabolic process                                       |
| 19538 | 2.12E-36          | protein metabolic process                               |
| 44262 | 2.44E-33          | cellular carbohydrate metabolic process                 |
| 44267 | 6.01E-33          | cellular protein metabolic process                      |
| 5975  | 6.01E-33          | carbohydrate metabolic process                          |
| 16043 | 3.23E-30          | cellular component organization                         |
| 44260 | 4.12E-30          | cellular macromolecule metabolic process                |
| 44248 | 5.47E-30          | cellular catabolic process                              |
| 34641 | 7.98E-30          | cellular nitrogen compound metabolic process            |
| 43170 | 6.66E-29          | macromolecule metabolic process                         |
| 44282 | 1.34E-28          | small molecule catabolic process                        |
| 6807  | 1.80E-28          | nitrogen compound metabolic process                     |
| 6066  | 1.95E-27          | alcohol metabolic process                               |
| 5996  | 1.52E-25          | monosaccharide metabolic process                        |
| 46483 | 1.98E-24          | heterocycle metabolic process                           |
| 9059  | 3.14E-24          | macromolecule biosynthetic process                      |
| 34645 | 6.80E-23          | cellular macromolecule biosynthetic process             |
| 6996  | 1.30E-22          | organelle organization                                  |
| 55086 | 1.67E-22          | nucleobase, nucleoside and nucleotide metabolic process |
| 9117  | 4.70E-22          | nucleotide metabolic process                            |
| 6753  | 4.70E-22          | nucleoside phosphate metabolic process                  |
| 44085 | 8.25E-22          | cellular component biogenesis                           |
| 42180 | 2.22E-21          | cellular ketone metabolic process                       |
