# Supplementary material for: Diel rewiring and positive selection of ancient plant proteins enabled evolution of CAM photosynthesis in Agave
Source: PubMed Central journal article supplement (PMC6090859; doi:10.1186/s12864-018-4964-7), 2018-08-06
Supplement: 12864_2018_4964_MOESM4_ESM.pdf [file 12864_2018_4964_MOESM4_ESM.pdf]

**Table S3.** Biological processes over-represented in ortholog clade C<sub>3</sub>:CAM:C<sub>4</sub> in *Agave americana*. C<sub>3</sub>:CAM:C<sub>4</sub> represents orthologs shared only by C<sub>3</sub>, CAM and C<sub>4</sub> species.

| GO ID | Corrected | Description                                                                         |
|-------|-----------|-------------------------------------------------------------------------------------|
| 9963  | 6.93E-06  | positive regulation of flavonoid biosynthetic process                               |
| 45449 | 5.65E-05  | regulation of transcription                                                         |
| 9962  | 6.42E-05  | regulation of flavonoid biosynthetic process                                        |
| 6355  | 6.42E-05  | regulation of transcription, DNA-dependent                                          |
| 51252 | 8.74E-05  | regulation of RNA metabolic process                                                 |
| 9889  | 8.74E-05  | regulation of biosynthetic process                                                  |
| 31326 | 8.74E-05  | regulation of cellular biosynthetic process                                         |
| 10200 | 2.44E-04  | response to chitin                                                                  |
| 10468 | 2.59E-04  | regulation of gene expression                                                       |
| 80090 | 5.23E-04  | regulation of primary metabolic process                                             |
| 10089 | 6.52E-04  | xylem development                                                                   |
| 10556 | 6.52E-04  | regulation of macromolecule biosynthetic process                                    |
| 6855  | 6.97E-04  | drug transmembrane transport                                                        |
| 15893 | 6.97E-04  | drug transport                                                                      |
| 19219 | 6.97E-04  | regulation of nucleobase, nucleoside, nucleotide and nucleic acid metabolic process |
| 31323 | 9.84E-04  | regulation of cellular metabolic process                                            |
| 60255 | 9.84E-04  | regulation of macromolecule metabolic process                                       |
| 42493 | 9.84E-04  | response to drug                                                                    |
| 51171 | 1.25E-03  | regulation of nitrogen compound metabolic process                                   |
| 19222 | 1.33E-03  | regulation of metabolic process                                                     |
| 10087 | 2.22E-03  | phloem or xylem histogenesis                                                        |
| 43455 | 5.07E-03  | regulation of secondary metabolic process                                           |
| 9725  | 2.72E-02  | response to hormone stimulus                                                        |
| 9061  | 4.01E-02  | anaerobic respiration                                                               |
