# Supplementary material for: Diel rewiring and positive selection of ancient plant proteins enabled evolution of CAM photosynthesis in Agave
Source: PubMed Central journal article supplement (PMC6090859; doi:10.1186/s12864-018-4964-7), 2018-08-06
Supplement: 12864_2018_4964_MOESM6_ESM.pdf [file 12864_2018_4964_MOESM6_ESM.pdf]

**Table S5.** Distribution of co-expression modules in each individual ortholog clade in *Agave americana*. The numbers represent the observed and expected (in parentheses) number of genes in each pairwise combination of co-expression modules and ortholog clades.

| Module | NVP:C <sub>3</sub> :CAM:C <sub>4</sub> | NVP:C <sub>3</sub> :CAM | NVP:CAM:C <sub>4</sub> | NVP:CAM | C <sub>3</sub> :CAM:C <sub>4</sub> | C <sub>3</sub> :CAM  | CAM:C <sub>4</sub> | CAM-only               | Total |
|--------|----------------------------------------|-------------------------|------------------------|---------|------------------------------------|----------------------|--------------------|------------------------|-------|
| M01    | 1796 (1543) <sup>a</sup>               | 34 (34)                 | 0 (1)                  | 3 (11)  | 318 (409) <sup>b</sup>             | 60 (96) <sup>b</sup> | 11 (10)            | 213 (330) <sup>b</sup> | 2435  |
| M02    | 404 (393)                              | 15 (9)                  | 0 (0)                  | 1 (3)   | 87 (104)                           | 28 (25)              | 3 (3)              | 82 (84)                | 620   |
| M03    | 419 (414)                              | 12 (9)                  | 0 (0)                  | 4 (3)   | 107 (110)                          | 25 (26)              | 2 (3)              | 85 (89)                | 654   |
| M04    | 201 (278) <sup>b</sup>                 | 12 (6)                  | 0 (0)                  | 2 (2)   | 113 (74) <sup>a</sup>              | 19 (17)              | 1 (2)              | 90 (59) <sup>a</sup>   | 438   |
| M05    | 251 (215)                              | 1 (5)                   | 0 (0)                  | 0 (2)   | 38 (57)                            | 7 (13)               | 1 (1)              | 42 (46)                | 340   |
| M06    | 215 (217)                              | 1 (5)                   | 0 (0)                  | 1 (2)   | 63 (57)                            | 16 (14)              | 0 (1)              | 46 (46)                | 342   |
| M07    | 520 (580)                              | 8 (13)                  | 1 (0)                  | 7 (4)   | 189 (154) <sup>a</sup>             | 40 (36)              | 3 (4)              | 147 (124)              | 915   |
| M08    | 90 (112)                               | 1 (2)                   | 0 (0)                  | 2 (1)   | 47 (30) <sup>a</sup>               | 6 (7)                | 0 (1)              | 31 (24)                | 177   |
| M09    | 466 (521)                              | 12 (12)                 | 1 (0)                  | 8 (4)   | 160 (138)                          | 39 (33)              | 1 (4)              | 136 (112)              | 823   |
| M10    | 1434 (1547) <sup>b</sup>               | 47 (34)                 | 1 (1)                  | 10 (11) | 404 (410)                          | 104 (97)             | 11 (10)            | 430 (331) <sup>a</sup> | 2441  |
| M11    | 200 (272) <sup>b</sup>                 | 5 (6)                   | 0 (0)                  | 4 (2)   | 123 (72) <sup>a</sup>              | 24 (17)              | 1 (2)              | 72 (58)                | 429   |
| M12    | 113 (151) <sup>b</sup>                 | 1 (3)                   | 0 (0)                  | 2 (1)   | 47 (40)                            | 19 (9)               | 0 (1)              | 56 (32) <sup>a</sup>   | 238   |
| M13    | 592 (603)                              | 10 (13)                 | 1 (0)                  | 3 (4)   | 163 (160)                          | 50 (38)              | 5 (4)              | 127 (129)              | 951   |
| M14    | 457 (471)                              | 10 (10)                 | 0 (0)                  | 8 (3)   | 150 (125)                          | 24 (29)              | 3 (3)              | 92 (101)               | 744   |
| M15    | 78 (103)                               | 1 (2)                   | 0 (0)                  | 1 (1)   | 38 (27)                            | 14 (6)               | 3 (1)              | 27 (22)                | 162   |
| M16    | 122 (136)                              | 3 (3)                   | 0 (0)                  | 1 (1)   | 39 (36)                            | 7 (9)                | 1 (1)              | 42 (29)                | 215   |
| other  | 1629 (1432) <sup>a</sup>               | 27 (32)                 | 1 (1)                  | 9 (11)  | 295 (379) <sup>b</sup>             | 79 (89)              | 15 (10)            | 205 (306) <sup>b</sup> | 2260  |

<sup>a</sup>Overrepresentation ( $P < 0.01$ , cumulative Poisson distribution) of co-expression modules in each ortholog clade. <sup>b</sup>Underrepresentation ( $P < 0.01$ , cumulative Poisson distribution) of co-expression modules in each ortholog clade.

Note: NVP:C<sub>3</sub>:CAM:C<sub>4</sub> represents orthologs shared by NVP, C<sub>3</sub>, CAM and C<sub>4</sub> (i.e. non-vascular plants). NVP:C<sub>3</sub>:CAM represents orthologs shared only by NVP, C<sub>3</sub> and CAM. NVP:CAM:C<sub>4</sub> represents orthologs shared only by NVP, CAM and C<sub>4</sub>. NVP:CAM represents orthologs shared only by NVP and CAM. C<sub>3</sub>:CAM:C<sub>4</sub> represents orthologs shared only by C<sub>3</sub>, CAM and C<sub>4</sub>. C<sub>3</sub>:CAM represents orthologs shared only by C<sub>3</sub> and CAM. CAM:C<sub>4</sub> represents orthologs shared only by CAM and C<sub>4</sub>. CAM-only represent orthologs only in CAM species.
