# Supplementary material for: Diel rewiring and positive selection of ancient plant proteins enabled evolution of CAM photosynthesis in Agave
Source: PubMed Central journal article supplement (PMC6090859; doi:10.1186/s12864-018-4964-7), 2018-08-06
Supplement: 12864_2018_4964_MOESM7_ESM.pdf [file 12864_2018_4964_MOESM7_ESM.pdf]

**Table S6.** List of *Agave americana* genes that have homologs in other three independent CAM lineages but not in 21 non-CAM plant species.

| <b>Gene ID</b> | <b>Functional description</b>                             |
|----------------|-----------------------------------------------------------|
| Aam366668      | Unknown                                                   |
| Aam074797      | Unknown                                                   |
| Aam052521      | light-regulated zinc finger protein, B-box domain protein |
| Aam052525      | light-regulated zinc finger protein, B-box domain protein |
| Aam052527      | light-regulated zinc finger protein, B-box domain protein |
| Aam344359      | light-regulated zinc finger protein, B-box domain protein |
| Aam301242      | Unknown                                                   |
| Aam073892      | nucleolin like protein                                    |
| Aam304970      | nuclear factor Y like protein                             |
| Aam213899      | CLAVATA3/ESR-RELATED protein                              |
| Aam009930      | global transcription factor group E7 protein              |
| Aam047295      | GATA transcription factor 11 like protein                 |
| Aam082065      | histone deacetylase like                                  |
