# Supplementary material for: Diel rewiring and positive selection of ancient plant proteins enabled evolution of CAM photosynthesis in Agave
Source: PubMed Central journal article supplement (PMC6090859; doi:10.1186/s12864-018-4964-7), 2018-08-06
Supplement: 12864_2018_4964_MOESM8_ESM.pdf [file 12864_2018_4964_MOESM8_ESM.pdf]

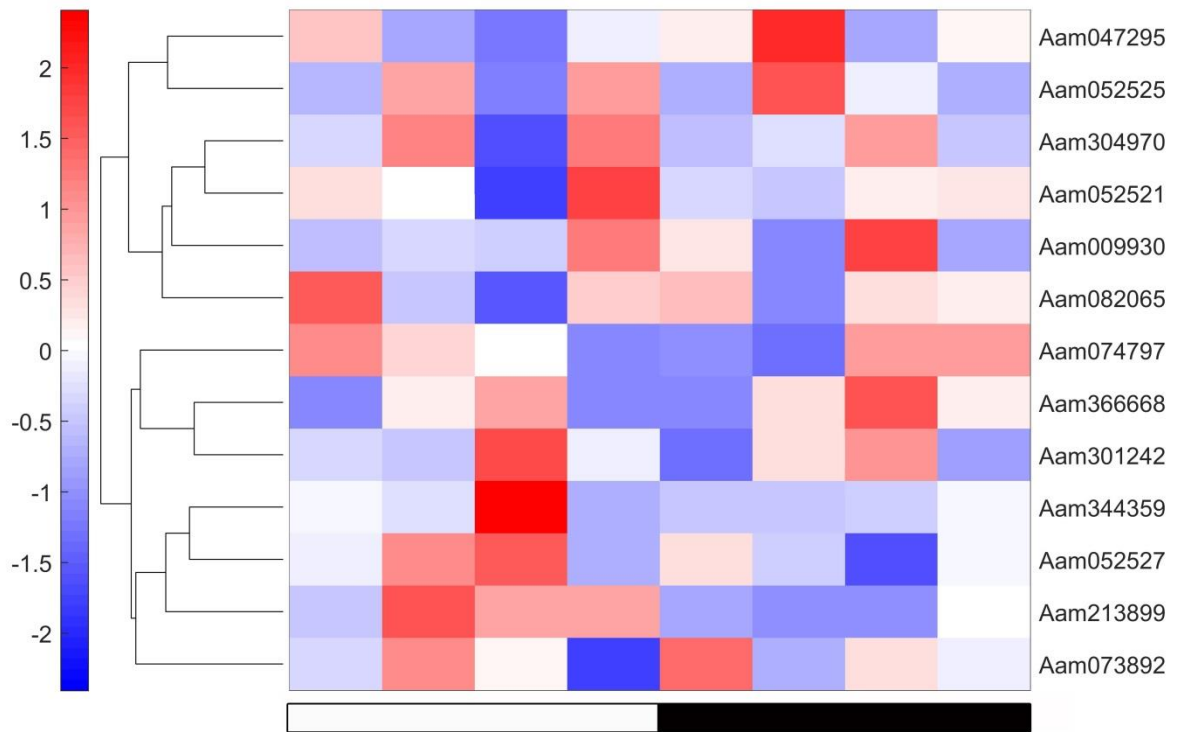

**Figure S2.** The diel expression pattern of conserved CAM-specific genes in *Agave*. The expression levels were normalized by z-score and visualized by heatmap plot. White and black bars indicate daytime (12-hour) and nighttime (12-hour), respectively.
