# Supplementary material for: Diel rewiring and positive selection of ancient plant proteins enabled evolution of CAM photosynthesis in Agave
Source: PubMed Central journal article supplement (PMC6090859; doi:10.1186/s12864-018-4964-7), 2018-08-06
Supplement: 12864_2018_4964_MOESM9_ESM.pdf [file 12864_2018_4964_MOESM9_ESM.pdf]

**Table S7.** List of *Agave americana* genes with Ka/Ks ratio greater than one in *Agave-Arabidopsis*, *Agave-Oryza* and *Agave-Zea* pairs. P-values indicating the significance of Ka/Ks ratio greater than one, as calculated using one-sided t-test. “nd” indicates not enough positive sites for significance tests.

| Gene ID  | Ortholog clade | P-value<br>( <i>Agave-Arabidopsis</i> ) | P-value<br>( <i>Agave-Oryza</i> ) | P-value<br>( <i>Agave-Zea</i> ) |
|----------|----------------|-----------------------------------------|-----------------------------------|---------------------------------|
| Aam00023 | C3:CAM:C4      | 1.00E-04                                | 1.57E-07                          | 5.10E-08                        |
| Aam04413 | C3:CAM:C4      | nd                                      | 2.03E-24                          | 6.11E-23                        |
| Aam04795 | C3:CAM:C4      | 1.18E-02                                | 6.59E-23                          | 1.49E-25                        |
| Aam07788 | C3:CAM:C4      | nd                                      | 5.40E-52                          | 1.86E-24                        |
| Aam01341 | C3:CAM:C4      | 6.82E-09                                | 2.59E-36                          | 1.35E-50                        |
| Aam04567 | C3:CAM:C4      | 1.60E-15                                | 3.38E-71                          | 5.71E-42                        |
| Aam00473 | C3:CAM:C4      | 9.34E-02                                | 3.31E-43                          | 4.56E-56                        |
| Aam04553 | C3:CAM:C4      | 1.27E-10                                | 1.22E-39                          | 9.85E-30                        |
| Aam08546 | C3:CAM:C4      | 1.90E-07                                | 1.14E-26                          | 9.75E-35                        |
| Aam08778 | C3:CAM:C4      | 1.63E-02                                | 6.51E-38                          | 1.58E-25                        |
| Aam08786 | C3:CAM:C4      | 3.72E-08                                | 1.66E-80                          | 6.99E-72                        |
| Aam08840 | C3:CAM:C4      | 1.28E-28                                | 4.90E-93                          | 2.63E-50                        |
| Aam04352 | C3:CAM:C4      | 1.20E-03                                | 4.49E-32                          | 4.16E-84                        |
| Aam00635 | C3:CAM:C4      | 1.32E-05                                | 3.68E-25                          | 3.52E-28                        |
| Aam04808 | C3:CAM:C4      | 8.60E-02                                | 1.06E-35                          | 1.70E-109                       |
| Aam00062 | C3:CAM:C4      | 1.25E-04                                | 7.63E-60                          | 1.07E-26                        |
| Aam01359 | C3:CAM:C4      | 8.94E-08                                | 7.88E-29                          | 6.51E-31                        |
| Aam04423 | C3:CAM:C4      | nd                                      | 2.26E-21                          | 3.98E-23                        |
| Aam05001 | C3:CAM:C4      | nd                                      | 2.39E-63                          | 7.46E-95                        |
| Aam07677 | C3:CAM:C4      | 2.53E-03                                | 3.09E-10                          | 9.64E-07                        |
| Aam08294 | C3:CAM:C4      | 5.60E-02                                | 2.96E-43                          | 1.00E-06                        |
| Aam08295 | C3:CAM:C4      | 4.83E-08                                | 1.38E-12                          | 2.88E-36                        |
| Aam08470 | C3:CAM:C4      | 4.39E-04                                | 2.14E-20                          | 2.62E-11                        |
| Aam08603 | C3:CAM:C4      | 9.53E-04                                | 4.98E-78                          | 9.75E-35                        |
| Aam08644 | C3:CAM:C4      | 8.55E-03                                | 9.45E-02                          | 3.01E-39                        |
| Aam08710 | C3:CAM:C4      | 3.61E-09                                | 1.07E-24                          | 6.85E-55                        |
| Aam08734 | C3:CAM:C4      | 6.45E-07                                | 4.92E-64                          | 6.81E-45                        |
| Aam08754 | C3:CAM:C4      | 1.60E-02                                | 3.81E-28                          | 2.70E-17                        |
| Aam08769 | C3:CAM:C4      | 7.13E-14                                | 2.18E-50                          | 6.12E-93                        |
| Aam08821 | C3:CAM:C4      | 3.13E-26                                | 1.06E-104                         | 5.81E-67                        |
| Aam08831 | C3:CAM:C4      | 6.48E-11                                | 2.49E-18                          | 7.69E-49                        |
| Aam09352 | C3:CAM:C4      | 1.31E-02                                | 1.87E-24                          | 5.89E-05                        |
| Aam34102 | C3:CAM:C4      | nd                                      | 1.95E-26                          | 7.38E-21                        |
| Aam34501 | C3:CAM:C4      | 3.60E-03                                | 6.42E-26                          | 2.17E-28                        |
| Aam07856 | C3:CAM:C4      | 2.52E-02                                | 2.50E-43                          | 5.24E-34                        |
| Aam07553 | C3:CAM:C4      | 2.60E-02                                | 1.03E-01                          | nd                              |

|                 |               |          |           |           |
|-----------------|---------------|----------|-----------|-----------|
| <b>Aam00373</b> | C3:CAM:C4     | 1.27E-15 | 7.49E-07  | 4.77E-14  |
| <b>Aam00252</b> | C3:CAM:C4     | 8.07E-03 | 3.55E-36  | 4.32E-32  |
| <b>Aam01365</b> | C3:CAM:C4     | 1.95E-02 | 9.06E-98  | 2.16E-63  |
| <b>Aam04498</b> | C3:CAM:C4     | 4.39E-04 | 2.06E-20  | 3.95E-49  |
| <b>Aam05516</b> | NVP:C3:CAM:C4 | 1.49E-08 | 1.10E-41  | 2.35E-43  |
| <b>Aam05793</b> | NVP:C3:CAM:C4 | 2.68E-02 | 1.69E-56  | 2.59E-60  |
| <b>Aam08122</b> | NVP:C3:CAM:C4 | 3.31E-02 | 1.63E-15  | 5.47E-36  |
| <b>Aam08663</b> | NVP:C3:CAM:C4 | 1.16E-26 | 5.98E-37  | 2.55E-49  |
| <b>Aam08718</b> | NVP:C3:CAM:C4 | 3.71E-25 | 1.61E-70  | 1.01E-20  |
| <b>Aam08782</b> | NVP:C3:CAM:C4 | 6.23E-08 | 3.93E-34  | 8.42E-46  |
| <b>Aam34310</b> | NVP:C3:CAM:C4 | 2.41E-07 | 5.13E-15  | 1.23E-32  |
| <b>Aam01284</b> | NVP:C3:CAM:C4 | 8.48E-02 | 3.12E-44  | 1.73E-43  |
| <b>Aam04474</b> | NVP:C3:CAM:C4 | 1.00E-01 | 2.96E-37  | 1.66E-29  |
| <b>Aam04431</b> | NVP:C3:CAM:C4 | 5.26E-09 | 1.12E-14  | 3.33E-21  |
| <b>Aam05128</b> | NVP:C3:CAM:C4 | 8.19E-07 | 3.16E-36  | 1.38E-07  |
| <b>Aam08135</b> | NVP:C3:CAM:C4 | 3.08E-04 | 2.27E-50  | 2.69E-30  |
| <b>Aam08506</b> | NVP:C3:CAM:C4 | nd       | 1.10E-72  | 2.88E-37  |
| <b>Aam08000</b> | NVP:C3:CAM:C4 | 7.78E-03 | 5.65E-51  | 4.14E-55  |
| <b>Aam00023</b> | NVP:C3:CAM:C4 | 8.06E-10 | 2.67E-71  | 2.21E-51  |
| <b>Aam00468</b> | NVP:C3:CAM:C4 | 1.11E-07 | 3.57E-61  | 1.59E-45  |
| <b>Aam01303</b> | NVP:C3:CAM:C4 | 1.55E-10 | 1.11E-93  | 1.58E-74  |
| <b>Aam01357</b> | NVP:C3:CAM:C4 | 1.64E-01 | 5.46E-33  | 3.24E-65  |
| <b>Aam01364</b> | NVP:C3:CAM:C4 | 3.02E-02 | 1.18E-36  | 1.08E-43  |
| <b>Aam04585</b> | NVP:C3:CAM:C4 | 7.08E-03 | 4.07E-60  | 1.69E-52  |
| <b>Aam05327</b> | NVP:C3:CAM:C4 | 8.88E-02 | 2.11E-37  | 1.05E-46  |
| <b>Aam08025</b> | NVP:C3:CAM:C4 | 2.01E-01 | 2.00E-23  | 3.70E-03  |
| <b>Aam08051</b> | NVP:C3:CAM:C4 | 8.16E-03 | 9.06E-65  | 1.90E-65  |
| <b>Aam08205</b> | NVP:C3:CAM:C4 | 1.87E-09 | 1.68E-35  | 5.99E-42  |
| <b>Aam08234</b> | NVP:C3:CAM:C4 | 3.20E-07 | 1.53E-23  | 1.32E-19  |
| <b>Aam08283</b> | NVP:C3:CAM:C4 | 2.27E-08 | 1.70E-69  | 8.70E-67  |
| <b>Aam08325</b> | NVP:C3:CAM:C4 | 1.59E-07 | 6.83E-111 | 4.17E-90  |
| <b>Aam08328</b> | NVP:C3:CAM:C4 | 1.99E-02 | 4.83E-40  | 5.76E-76  |
| <b>Aam08521</b> | NVP:C3:CAM:C4 | 3.86E-18 | 4.36E-107 | 5.70E-66  |
| <b>Aam08581</b> | NVP:C3:CAM:C4 | 1.31E-14 | 5.74E-84  | 5.18E-47  |
| <b>Aam08681</b> | NVP:C3:CAM:C4 | 4.66E-05 | 7.44E-100 | 1.06E-48  |
| <b>Aam08740</b> | NVP:C3:CAM:C4 | 3.39E-07 | 6.61E-43  | 1.55E-27  |
| <b>Aam08742</b> | NVP:C3:CAM:C4 | 5.71E-25 | 2.84E-35  | 6.44E-38  |
| <b>Aam08747</b> | NVP:C3:CAM:C4 | 5.09E-03 | 2.79E-32  | 9.51E-07  |
| <b>Aam08758</b> | NVP:C3:CAM:C4 | 1.67E-11 | 6.94E-49  | 1.76E-49  |
| <b>Aam08775</b> | NVP:C3:CAM:C4 | 3.18E-14 | 5.25E-67  | 5.88E-77  |
| <b>Aam08781</b> | NVP:C3:CAM:C4 | 2.15E-14 | 3.47E-40  | 3.14E-45  |
| <b>Aam08806</b> | NVP:C3:CAM:C4 | 1.05E-21 | 5.95E-140 | 7.44E-103 |
| <b>Aam08814</b> | NVP:C3:CAM:C4 | 2.22E-05 | 5.20E-34  | 4.69E-13  |
| <b>Aam08836</b> | NVP:C3:CAM:C4 | 8.67E-17 | 1.24E-54  | 4.09E-32  |

|                 |               |          |           |          |
|-----------------|---------------|----------|-----------|----------|
| <b>Aam04507</b> | C3:CAM:C4     | 1.57E-06 | 8.86E-18  | 1.73E-10 |
| <b>Aam04509</b> | C3:CAM:C4     | 8.77E-26 | 5.77E-89  | 1.14E-91 |
| <b>Aam04542</b> | C3:CAM:C4     | 2.84E-04 | 5.99E-06  | 4.60E-35 |
| <b>Aam04586</b> | C3:CAM:C4     | 1.20E-04 | 8.80E-58  | 1.00E-58 |
| <b>Aam04587</b> | C3:CAM:C4     | 5.63E-02 | 2.09E-47  | 2.99E-84 |
| <b>Aam05283</b> | C3:CAM:C4     | 2.40E-02 | 1.78E-18  | 3.56E-16 |
| <b>Aam07933</b> | C3:CAM:C4     | 2.18E-02 | 4.98E-56  | 1.47E-91 |
| <b>Aam08352</b> | C3:CAM:C4     | 1.93E-06 | 2.08E-09  | 5.47E-24 |
| <b>Aam08449</b> | C3:CAM:C4     | nd       | 2.29E-44  | 2.60E-30 |
| <b>Aam08609</b> | C3:CAM:C4     | 1.16E-12 | 1.04E-45  | 9.14E-28 |
| <b>Aam08782</b> | C3:CAM:C4     | 4.11E-09 | 4.51E-39  | 1.46E-39 |
| <b>Aam08788</b> | C3:CAM:C4     | 1.86E-03 | 2.33E-54  | 1.55E-45 |
| <b>Aam08798</b> | C3:CAM:C4     | 2.46E-03 | 2.62E-24  | 1.33E-23 |
| <b>Aam08828</b> | C3:CAM:C4     | 9.84E-19 | 1.96E-48  | 1.66E-40 |
| <b>Aam08831</b> | C3:CAM:C4     | 1.31E-08 | 1.74E-60  | 9.62E-68 |
| <b>Aam09416</b> | C3:CAM:C4     | 1.29E-24 | 3.05E-54  | 3.17E-30 |
| <b>Aam00048</b> | NVP:C3:CAM:C4 | 5.98E-05 | 1.75E-44  | 2.53E-49 |
| <b>Aam00918</b> | NVP:C3:CAM:C4 | 3.86E-07 | 6.31E-18  | 3.14E-10 |
| <b>Aam01800</b> | NVP:C3:CAM:C4 | 2.43E-15 | 2.10E-37  | 2.28E-44 |
| <b>Aam01857</b> | NVP:C3:CAM:C4 | nd       | 1.51E-16  | 8.72E-21 |
| <b>Aam04466</b> | NVP:C3:CAM:C4 | 8.93E-08 | 5.74E-71  | 6.38E-56 |
| <b>Aam04875</b> | NVP:C3:CAM:C4 | 1.55E-01 | 1.66E-09  | 4.09E-32 |
| <b>Aam05101</b> | NVP:C3:CAM:C4 | 5.56E-05 | 4.65E-23  | 1.79E-57 |
| <b>Aam05587</b> | NVP:C3:CAM:C4 | 4.19E-07 | 7.31E-34  | 1.78E-32 |
| <b>Aam08286</b> | NVP:C3:CAM:C4 | 6.86E-13 | nd        | 0.00E+00 |
| <b>Aam08442</b> | NVP:C3:CAM:C4 | 2.32E-05 | 7.33E-95  | 2.90E-58 |
| <b>Aam04505</b> | NVP:C3:CAM:C4 | 2.10E-14 | 9.25E-86  | 3.56E-55 |
| <b>Aam04565</b> | NVP:C3:CAM:C4 | 3.45E-15 | 8.55E-42  | 9.04E-50 |
| <b>Aam07799</b> | NVP:C3:CAM:C4 | 2.79E-08 | 1.38E-54  | 6.81E-32 |
| <b>Aam07894</b> | NVP:C3:CAM:C4 | 2.26E-07 | 2.31E-79  | 9.84E-35 |
| <b>Aam07901</b> | NVP:C3:CAM:C4 | nd       | 2.58E-102 | 9.16E-61 |
| <b>Aam07926</b> | NVP:C3:CAM:C4 | 2.98E-02 | 5.55E-23  | 2.42E-21 |
| <b>Aam08204</b> | NVP:C3:CAM:C4 | 1.36E-08 | 2.86E-25  | 2.18E-38 |
| <b>Aam08497</b> | NVP:C3:CAM:C4 | nd       | 3.10E-39  | 2.81E-66 |
| <b>Aam08598</b> | NVP:C3:CAM:C4 | 1.23E-02 | 2.94E-46  | 7.37E-72 |
| <b>Aam08711</b> | NVP:C3:CAM:C4 | 1.07E-03 | 6.95E-114 | 1.80E-80 |
| <b>Aam08814</b> | NVP:C3:CAM:C4 | 2.32E-03 | 7.02E-51  | 1.30E-68 |
| <b>Aam00476</b> | NVP:C3:CAM:C4 | 5.75E-02 | 3.58E-14  | 2.20E-24 |
| <b>Aam01025</b> | NVP:C3:CAM:C4 | 1.41E-05 | 3.69E-19  | 2.73E-37 |
| <b>Aam04971</b> | NVP:C3:CAM:C4 | 1.86E-11 | 2.21E-21  | 4.43E-18 |
| <b>Aam34482</b> | NVP:C3:CAM:C4 | 1.44E-05 | 4.14E-52  | 4.33E-27 |
| <b>Aam34534</b> | NVP:C3:CAM:C4 | 2.40E-04 | 2.10E-18  | 1.37E-08 |
| <b>Aam34963</b> | NVP:C3:CAM:C4 | 3.07E-05 | 3.25E-08  | 1.10E-17 |
| <b>Aam35460</b> | NVP:C3:CAM:C4 | 5.17E-10 | 1.93E-69  | 3.06E-61 |

|                 |               |          |           |           |
|-----------------|---------------|----------|-----------|-----------|
| <b>Aam01159</b> | NVP:C3:CAM:C4 | 3.30E-02 | 1.83E-33  | 2.06E-07  |
| <b>Aam04932</b> | NVP:C3:CAM:C4 | 1.94E-01 | 6.58E-67  | 6.41E-31  |
| <b>Aam08544</b> | NVP:C3:CAM:C4 | 1.38E-03 | 6.62E-48  | 1.51E-52  |
| <b>Aam34148</b> | NVP:C3:CAM:C4 | 2.76E-06 | 3.23E-18  | 4.33E-21  |
| <b>Aam05438</b> | NVP:C3:CAM:C4 | 1.64E-10 | 4.12E-12  | 9.56E-13  |
| <b>Aam08176</b> | NVP:C3:CAM:C4 | 1.59E-01 | 1.08E-38  | 4.59E-38  |
| <b>Aam08787</b> | NVP:C3:CAM:C4 | 3.99E-03 | 1.88E-88  | 2.42E-63  |
| <b>Aam08157</b> | NVP:C3:CAM:C4 | 1.47E-01 | 2.79E-23  | 1.23E-22  |
| <b>Aam00477</b> | NVP:C3:CAM:C4 | 2.11E-15 | 2.32E-65  | 3.46E-99  |
| <b>Aam01020</b> | NVP:C3:CAM:C4 | 6.36E-08 | 3.62E-71  | 9.82E-58  |
| <b>Aam04356</b> | NVP:C3:CAM:C4 | 4.28E-08 | 4.05E-06  | 2.79E-20  |
| <b>Aam04378</b> | NVP:C3:CAM:C4 | 1.73E-10 | 1.76E-26  | 1.12E-45  |
| <b>Aam04386</b> | NVP:C3:CAM:C4 | 2.12E-02 | 1.39E-32  | 4.40E-25  |
| <b>Aam04520</b> | NVP:C3:CAM:C4 | 9.01E-06 | 3.54E-68  | 8.64E-21  |
| <b>Aam04579</b> | NVP:C3:CAM:C4 | 1.07E-06 | 2.61E-31  | 4.22E-42  |
| <b>Aam04580</b> | NVP:C3:CAM:C4 | 3.25E-11 | 5.66E-32  | 3.06E-48  |
| <b>Aam04585</b> | NVP:C3:CAM:C4 | 3.33E-09 | 7.08E-103 | 9.68E-109 |
| <b>Aam04589</b> | NVP:C3:CAM:C4 | 6.02E-15 | 8.89E-135 | 7.70E-126 |
| <b>Aam04593</b> | NVP:C3:CAM:C4 | 4.78E-04 | 6.42E-54  | 5.86E-88  |
| <b>Aam05253</b> | NVP:C3:CAM:C4 | nd       | 1.78E-23  | 1.96E-06  |
| <b>Aam05414</b> | NVP:C3:CAM:C4 | 4.09E-03 | 2.05E-41  | 3.84E-63  |
| <b>Aam05729</b> | NVP:C3:CAM:C4 | 1.23E-03 | 9.51E-30  | 5.19E-57  |
| <b>Aam07884</b> | NVP:C3:CAM:C4 | 3.72E-03 | 4.18E-24  | 1.34E-31  |
| <b>Aam08264</b> | NVP:C3:CAM:C4 | 2.95E-03 | 1.09E-60  | 1.47E-25  |
| <b>Aam08349</b> | NVP:C3:CAM:C4 | 2.74E-06 | 2.40E-90  | 1.11E-42  |
| <b>Aam08512</b> | NVP:C3:CAM:C4 | 2.77E-10 | 3.66E-26  | 5.13E-29  |
| <b>Aam08601</b> | NVP:C3:CAM:C4 | 4.35E-12 | 3.42E-28  | 1.34E-43  |
| <b>Aam08724</b> | NVP:C3:CAM:C4 | 4.97E-10 | 2.00E-60  | 4.15E-19  |
| <b>Aam08769</b> | NVP:C3:CAM:C4 | 2.09E-14 | 9.41E-30  | 1.90E-55  |
| <b>Aam08770</b> | NVP:C3:CAM:C4 | 2.92E-06 | 2.43E-28  | 1.36E-40  |
| <b>Aam08779</b> | NVP:C3:CAM:C4 | 5.44E-06 | 2.54E-20  | 2.38E-79  |
| <b>Aam08802</b> | NVP:C3:CAM:C4 | 8.59E-07 | 1.19E-30  | 6.54E-32  |
| <b>Aam08824</b> | NVP:C3:CAM:C4 | 1.06E-07 | 7.76E-100 | 2.79E-37  |
| <b>Aam08834</b> | NVP:C3:CAM:C4 | 3.88E-03 | 2.18E-47  | 2.08E-108 |
| <b>Aam08836</b> | NVP:C3:CAM:C4 | 3.62E-23 | 1.43E-70  | 3.73E-71  |
| <b>Aam35294</b> | NVP:C3:CAM:C4 | 2.83E-02 | 1.14E-54  | 3.22E-37  |
