# Supplementary material for: Diel rewiring and positive selection of ancient plant proteins enabled evolution of CAM photosynthesis in Agave
Source: PubMed Central journal article supplement (PMC6090859; doi:10.1186/s12864-018-4964-7), 2018-08-06
Supplement: 12864_2018_4964_MOESM10_ESM.pdf [file 12864_2018_4964_MOESM10_ESM.pdf]

**Table S8.** Genes implicated in the CAM pathway undergoing positive selection as revealed from Ka/Ks ratio calculated from *Agave-Arabidopsis*, *Agave-Oryza* and *Agave-Zea* orthologous gene pairs.

| Agave gene             | Name        | Description                              | Function Category              | Ortholog clade**                       |
|------------------------|-------------|------------------------------------------|--------------------------------|----------------------------------------|
| Aam048341 <sup>b</sup> | PPCK1       | Phosphoenolpyruvate carboxylase kinase 1 | Carbon fixation                | C <sub>3</sub> :CAM:C <sub>4</sub>     |
| Aam048752 <sup>a</sup> | PCL1 or LUX | PHYTOCLOCK 1                             | Circadian-core                 | NVP:C <sub>3</sub> :CAM:C <sub>4</sub> |
| Aam006353 <sup>a</sup> | LHY         | LATE ELONGATED HYPOCOTYL                 | Circadian-core                 | C <sub>3</sub> :CAM:C <sub>4</sub>     |
| Aam085988 <sup>a</sup> | ELF3        | EARLY FLOWERING 3                        | Circadian-input                | NVP:C <sub>3</sub> :CAM:C <sub>4</sub> |
| Aam051010 <sup>a</sup> | PPDK-RP     | PPDK regulatory protein                  | Decarboxylation light reaction | NVP:C <sub>3</sub> :CAM:C <sub>4</sub> |
| Aam002877 <sup>b</sup> | Psi-D2      | Photosystem I subunit D-2                | Photosynthesis-PET             | NVP:C <sub>3</sub> :CAM:C <sub>4</sub> |
| Aam088315 <sup>a</sup> | GAUT7       | Galacturonosyltransferase 7              | Starch and sucrose metabolism  | C <sub>3</sub> :CAM:C <sub>4</sub>     |
| Aam082045 <sup>a</sup> | SS2         | Starch synthase 2                        | Starch and sucrose metabolism  | NVP:C <sub>3</sub> :CAM:C <sub>4</sub> |
| Aam049326 <sup>a</sup> | CT-BMY      | Chloroplast beta-amylase                 | Starch and sucrose metabolism  | NVP:C <sub>3</sub> :CAM:C <sub>4</sub> |

\*Note: “a” indicates Ka/Ks ratio greater than one in *Agave-Arabidopsis*, *Agave-Oryza* and *Agave-Zea* orthologous gene pair comparison. “b” indicates Ka/Ks ratio greater than one in *Agave-Arabidopsis* and *Agave-Oryza* and but not *Agave-Zea* orthologous gene pair comparison.

\*\*NVP:C<sub>3</sub>:CAM:C<sub>4</sub> represents orthologs shared by NVP, C<sub>3</sub>, CAM and C<sub>4</sub>. C<sub>3</sub>:CAM:C<sub>4</sub> represents orthologs shared only by C<sub>3</sub>, CAM and C<sub>4</sub>.
