# Supplementary material for: Diel rewiring and positive selection of ancient plant proteins enabled evolution of CAM photosynthesis in Agave
Source: PubMed Central journal article supplement (PMC6090859; doi:10.1186/s12864-018-4964-7), 2018-08-06
Supplement: 12864_2018_4964_MOESM11_ESM.pdf [file 12864_2018_4964_MOESM11_ESM.pdf]

**Table S9.** List of *Agave americana* genes with Ka/Ks ratio greater than one in *Agave-Arabidopsis* and *Agave-Oryza* but not *Agave-Zea* pairs.

| Gene ID   | Ortholog clade | Gene ID   | Ortholog clade |
|-----------|----------------|-----------|----------------|
| Aam004683 | C3:CAM:C4      | Aam332970 | NVP:C3:CAM:C4  |
| Aam014899 | C3:CAM:C4      | Aam357923 | NVP:C3:CAM:C4  |
| Aam045646 | C3:CAM:C4      | Aam004469 | NVP:C3:CAM:C4  |
| Aam079585 | C3:CAM:C4      | Aam046130 | NVP:C3:CAM:C4  |
| Aam085954 | C3:CAM:C4      | Aam083292 | NVP:C3:CAM:C4  |
| Aam000508 | C3:CAM:C4      | Aam000891 | NVP:C3:CAM:C4  |
| Aam044860 | C3:CAM:C4      | Aam004408 | NVP:C3:CAM:C4  |
| Aam086287 | C3:CAM:C4      | Aam013663 | NVP:C3:CAM:C4  |
| Aam046915 | C3:CAM:C4      | Aam022194 | NVP:C3:CAM:C4  |
| Aam007696 | C3:CAM:C4      | Aam044505 | NVP:C3:CAM:C4  |
| Aam013071 | C3:CAM:C4      | Aam044597 | NVP:C3:CAM:C4  |
| Aam019908 | C3:CAM:C4      | Aam045648 | NVP:C3:CAM:C4  |
| Aam045853 | C3:CAM:C4      | Aam045861 | NVP:C3:CAM:C4  |
| Aam051597 | C3:CAM:C4      | Aam055741 | NVP:C3:CAM:C4  |
| Aam063676 | C3:CAM:C4      | Aam056318 | NVP:C3:CAM:C4  |
| Aam086603 | C3:CAM:C4      | Aam074009 | NVP:C3:CAM:C4  |
| Aam048341 | C3:CAM:C4      | Aam081496 | NVP:C3:CAM:C4  |
| Aam084654 | C3:CAM:C4      | Aam082363 | NVP:C3:CAM:C4  |
| Aam081889 | C3:CAM:C4      | Aam082779 | NVP:C3:CAM:C4  |
| Aam011021 | C3:CAM:C4      | Aam087015 | NVP:C3:CAM:C4  |
| Aam003350 | C3:CAM:C4      | Aam088209 | NVP:C3:CAM:C4  |
| Aam045814 | C3:CAM:C4      | Aam004640 | NVP:C3:CAM:C4  |
| Aam083376 | C3:CAM:C4      | Aam075912 | NVP:C3:CAM:C4  |
| Aam087989 | C3:CAM:C4      | Aam081307 | NVP:C3:CAM:C4  |
| Aam088045 | C3:CAM:C4      | Aam004340 | NVP:C3:CAM:C4  |
| Aam325436 | C3:CAM:C4      | Aam013411 | NVP:C3:CAM:C4  |
| Aam000258 | NVP:C3:CAM:C4  | Aam013450 | NVP:C3:CAM:C4  |
| Aam000764 | NVP:C3:CAM:C4  | Aam038631 | NVP:C3:CAM:C4  |
| Aam002877 | NVP:C3:CAM:C4  | Aam044051 | NVP:C3:CAM:C4  |
| Aam004269 | NVP:C3:CAM:C4  | Aam044297 | NVP:C3:CAM:C4  |
| Aam011027 | NVP:C3:CAM:C4  | Aam045742 | NVP:C3:CAM:C4  |
| Aam017081 | NVP:C3:CAM:C4  | Aam052293 | NVP:C3:CAM:C4  |
| Aam076244 | NVP:C3:CAM:C4  | Aam078199 | NVP:C3:CAM:C4  |
| Aam076551 | NVP:C3:CAM:C4  | Aam078452 | NVP:C3:CAM:C4  |
| Aam077266 | NVP:C3:CAM:C4  | Aam079965 | NVP:C3:CAM:C4  |
| Aam083451 | NVP:C3:CAM:C4  | Aam083978 | NVP:C3:CAM:C4  |
| Aam087428 | NVP:C3:CAM:C4  | Aam085207 | NVP:C3:CAM:C4  |
| Aam324992 | NVP:C3:CAM:C4  | Aam085507 | NVP:C3:CAM:C4  |
| Aam327516 | NVP:C3:CAM:C4  | Aam085920 | NVP:C3:CAM:C4  |
| Aam000286 | NVP:C3:CAM:C4  | Aam086219 | NVP:C3:CAM:C4  |
| Aam087017 | NVP:C3:CAM:C4  | Aam087037 | NVP:C3:CAM:C4  |
| Aam322360 | NVP:C3:CAM:C4  | Aam087461 | NVP:C3:CAM:C4  |
| Aam055616 | NVP:C3:CAM:C4  | Aam087490 | NVP:C3:CAM:C4  |
| Aam086482 | NVP:C3:CAM:C4  | Aam087513 | NVP:C3:CAM:C4  |
| Aam087837 | NVP:C3:CAM:C4  | Aam088035 | NVP:C3:CAM:C4  |
| Aam088368 | NVP:C3:CAM:C4  | Aam088351 | NVP:C3:CAM:C4  |
| Aam088382 | NVP:C3:CAM:C4  | Aam349697 | NVP:C3:CAM:C4  |
