# Supplementary material for: Diel rewiring and positive selection of ancient plant proteins enabled evolution of CAM photosynthesis in Agave
Source: PubMed Central journal article supplement (PMC6090859; doi:10.1186/s12864-018-4964-7), 2018-08-06
Supplement: 12864_2018_4964_MOESM12_ESM.pdf [file 12864_2018_4964_MOESM12_ESM.pdf]

**Table S10.** The positively selected sites of candidates with  $Ka/Ks > 1$  from Table S9. The FUBAR model from HYPHY package were used to identify positively selected sites with posterior probabilities greater than 80%.

| GeneID    | Positive Codon | $\alpha$ | $\beta$ | $\beta - \alpha$ | Posterior Prob $\beta > \alpha$ | Emp. Bayes Factor | PSRF | Neff    |
|-----------|----------------|----------|---------|------------------|---------------------------------|-------------------|------|---------|
| Aam000258 | 12             | 0.41     | 1.07    | 0.67             | 0.83                            | 12.31             | 1.00 | 1190.36 |
| Aam000286 | 17             | 0.78     | 2.89    | 2.10             | 0.84                            | 17.40             | 1.00 | 553.82  |
|           | 50             | 0.14     | 0.39    | 0.25             | 0.86                            | 19.62             | 1.00 | 683.62  |
|           | 552            | 0.60     | 1.80    | 1.20             | 0.82                            | 14.56             | 1.00 | 671.85  |
| Aam000508 | 28             | 0.26     | 0.70    | 0.44             | 0.81                            | 13.58             | 1.00 | 3407.29 |
| Aam000764 | 23             | 0.49     | 1.39    | 0.90             | 0.82                            | 8.46              | 1.00 | 3198.77 |
|           | 37             | 0.82     | 2.78    | 1.95             | 0.83                            | 8.95              | 1.00 | 1729.78 |
|           | 205            | 0.14     | 0.31    | 0.18             | 0.82                            | 8.35              | 1.01 | 453.72  |
| Aam000891 | NO             |          |         |                  |                                 |                   |      |         |
| Aam002877 | 43             | 0.51     | 1.51    | 1.00             | 0.83                            | 10.73             | 1.01 | 502.70  |
|           | 60             | 0.74     | 2.70    | 1.96             | 0.83                            | 10.65             | 1.00 | 675.17  |
| Aam003350 | NO             |          |         |                  |                                 |                   |      |         |
| Aam004269 | NO             |          |         |                  |                                 |                   |      |         |
| Aam004340 | 23             | 0.96     | 3.08    | 2.12             | 0.81                            | 15.91             | 1.00 | 1678.57 |
|           | 73             | 1.33     | 4.42    | 3.09             | 0.80                            | 15.11             | 1.00 | 1222.25 |
|           | 75             | 0.84     | 3.51    | 2.67             | 0.87                            | 25.36             | 1.00 | 2512.80 |
|           | 92             | 0.25     | 0.78    | 0.53             | 0.83                            | 18.35             | 1.00 | 1904.04 |
|           | 539            | 1.09     | 4.16    | 3.07             | 0.83                            | 17.71             | 1.00 | 1855.21 |
| Aam004408 | NO             |          |         |                  |                                 |                   |      |         |
| Aam004469 | 22             | 0.43     | 1.22    | 0.79             | 0.82                            | 14.97             | 1.00 | 2014.72 |
| Aam004640 | 319            | 0.23     | 0.43    | 0.20             | 0.82                            | 8.96              | 1.00 | 1116.93 |
|           | 339            | 0.98     | 2.94    | 1.96             | 0.81                            | 8.37              | 1.00 | 1637.72 |
| Aam004683 | NO             |          |         |                  |                                 |                   |      |         |
| Aam007696 | NO             |          |         |                  |                                 |                   |      |         |
| Aam011021 | 60             | 0.80     | 2.87    | 2.07             | 0.83                            | 13.45             | 1.00 | 713.44  |
| Aam011027 | NO             |          |         |                  |                                 |                   |      |         |

|                  |     |      |      |      |      |       |      |         |
|------------------|-----|------|------|------|------|-------|------|---------|
| <b>Aam013071</b> | 353 | 0.20 | 0.37 | 0.16 | 0.80 | 7.58  | 1.02 | 254.92  |
|                  | 607 | 0.34 | 0.87 | 0.53 | 0.82 | 8.47  | 1.01 | 282.18  |
| <b>Aam013411</b> | NO  |      |      |      |      |       |      |         |
| <b>Aam013450</b> | 130 | 0.75 | 2.46 | 1.71 | 0.84 | 13.60 | 1.00 | 1289.13 |
|                  | 483 | 0.54 | 2.20 | 1.66 | 0.89 | 22.05 | 1.00 | 1859.83 |
|                  | 525 | 0.79 | 2.69 | 1.89 | 0.83 | 12.45 | 1.00 | 1209.43 |
|                  | 776 | 0.58 | 1.92 | 1.34 | 0.84 | 14.11 | 1.00 | 1405.38 |
| <b>Aam013663</b> | 389 | 1.14 | 4.37 | 3.23 | 0.84 | 28.14 | 1.01 | 399.69  |
|                  | 390 | 0.93 | 3.55 | 2.61 | 0.83 | 27.87 | 1.01 | 407.52  |
| <b>Aam014899</b> | NO  |      |      |      |      |       |      |         |
| <b>Aam017081</b> | 28  | 0.20 | 0.41 | 0.20 | 0.84 | 8.50  | 1.00 | 2177.50 |
|                  | 30  | 0.39 | 1.55 | 1.16 | 0.90 | 15.02 | 1.00 | 1098.06 |
|                  | 52  | 0.31 | 1.02 | 0.71 | 0.87 | 10.74 | 1.00 | 1307.44 |
|                  | 53  | 0.25 | 0.64 | 0.40 | 0.83 | 7.65  | 1.00 | 1964.69 |
|                  | 57  | 0.80 | 3.13 | 2.34 | 0.85 | 9.37  | 1.00 | 1186.96 |
| <b>Aam019908</b> | NO  |      |      |      |      |       |      |         |
| <b>Aam022194</b> | 123 | 0.93 | 3.59 | 2.66 | 0.83 | 10.75 | 1.00 | 1981.61 |
|                  | 261 | 0.56 | 2.34 | 1.78 | 0.85 | 12.47 | 1.00 | 1241.04 |
| <b>Aam038631</b> | NO  |      |      |      |      |       |      |         |
| <b>Aam044051</b> | 10  | 0.61 | 1.87 | 1.26 | 0.81 | 8.65  | 1.00 | 1177.56 |
|                  | 134 | 0.72 | 2.50 | 1.79 | 0.82 | 8.86  | 1.00 | 1116.57 |
|                  | 135 | 0.80 | 2.71 | 1.91 | 0.81 | 8.29  | 1.00 | 935.48  |
|                  | 150 | 0.15 | 0.43 | 0.28 | 0.81 | 8.54  | 1.00 | 639.48  |
|                  | 164 | 0.95 | 3.59 | 2.64 | 0.83 | 10.03 | 1.00 | 694.96  |
| <b>Aam044297</b> | 111 | 0.36 | 0.98 | 0.62 | 0.81 | 10.01 | 1.00 | 913.50  |
|                  | 181 | 0.67 | 2.22 | 1.54 | 0.83 | 11.10 | 1.00 | 837.80  |
|                  | 471 | 0.72 | 2.26 | 1.54 | 0.80 | 9.38  | 1.00 | 843.56  |
| <b>Aam044505</b> | NO  |      |      |      |      |       |      |         |
| <b>Aam044597</b> | 23  | 0.43 | 1.69 | 1.27 | 0.85 | 13.46 | 1.00 | 909.98  |
|                  | 519 | 0.63 | 1.94 | 1.32 | 0.80 | 9.74  | 1.00 | 1222.03 |
| <b>Aam044860</b> | NO  |      |      |      |      |       |      |         |
| <b>Aam045646</b> | 32  | 0.84 | 2.47 | 1.63 | 0.81 | 13.12 | 1.00 | 1013.8  |

|                  |      |      |      |      |      |       |      |         |
|------------------|------|------|------|------|------|-------|------|---------|
|                  |      |      |      |      |      |       |      | 3       |
| <b>Aam045648</b> | 256  | 0.12 | 0.28 | 0.15 | 0.85 | 18.45 | 1.00 | 1804.06 |
| <b>Aam045742</b> | NO   |      |      |      |      |       |      |         |
| <b>Aam045814</b> | 593  | 0.79 | 2.75 | 1.96 | 0.81 | 13.12 | 1.00 | 620.21  |
| <b>Aam045853</b> | NO   |      |      |      |      |       |      |         |
| <b>Aam045861</b> | 1046 | 0.12 | 0.41 | 0.30 | 0.86 | 19.12 | 1.00 | 1052.83 |
| <b>Aam046130</b> | NO   |      |      |      |      |       |      |         |
| <b>Aam046915</b> | 27   | 0.68 | 2.11 | 1.43 | 0.81 | 6.31  | 1.00 | 624.31  |
|                  | 32   | 0.91 | 2.98 | 2.07 | 0.82 | 6.72  | 1.00 | 793.98  |
|                  | 141  | 0.26 | 0.52 | 0.27 | 0.81 | 6.38  | 1.01 | 383.88  |
|                  | 181  | 0.46 | 1.48 | 1.02 | 0.84 | 8.00  | 1.01 | 444.60  |
| <b>Aam048341</b> | 124  | 0.82 | 2.86 | 2.04 | 0.83 | 10.38 | 1.00 | 1136.58 |
|                  | 219  | 0.82 | 2.76 | 1.93 | 0.82 | 9.86  | 1.00 | 1219.48 |
| <b>Aam051597</b> | 73   | 0.91 | 2.87 | 1.96 | 0.80 | 6.87  | 1.00 | 639.98  |
| <b>Aam052293</b> | 207  | 0.76 | 2.47 | 1.71 | 0.81 | 7.27  | 1.00 | 739.20  |
| <b>Aam055616</b> | 380  | 0.46 | 1.28 | 0.83 | 0.81 | 7.48  | 1.00 | 559.56  |
| <b>Aam055741</b> | NO   |      |      |      |      |       |      |         |
| <b>Aam056318</b> | 710  | 0.36 | 1.37 | 1.00 | 0.85 | 14.33 | 1.00 | 659.85  |
|                  | 960  | 0.92 | 3.15 | 2.23 | 0.81 | 10.85 | 1.00 | 631.09  |
| <b>Aam063676</b> | NO   |      |      |      |      |       |      |         |
| <b>Aam074009</b> | 8    | 0.88 | 3.35 | 2.47 | 0.85 | 12.91 | 1.00 | 588.27  |
|                  | 43   | 1.06 | 3.78 | 2.72 | 0.82 | 10.41 | 1.00 | 558.94  |
|                  | 50   | 0.27 | 1.25 | 0.98 | 0.91 | 22.97 | 1.00 | 1006.10 |
|                  | 55   | 0.54 | 2.28 | 1.74 | 0.88 | 16.53 | 1.00 | 826.05  |
|                  | 57   | 0.49 | 1.58 | 1.09 | 0.85 | 13.64 | 1.00 | 1016.07 |
|                  | 58   | 0.72 | 3.14 | 2.42 | 0.87 | 15.54 | 1.00 | 642.07  |
| <b>Aam075912</b> | 7    | 0.76 | 2.36 | 1.60 | 0.82 | 9.36  | 1.00 | 2626.72 |
| <b>Aam076244</b> | NO   |      |      |      |      |       |      |         |
| <b>Aam076551</b> | 9    | 0.61 | 1.80 | 1.18 | 0.82 | 10.76 | 1.00 | 535.93  |
| <b>Aam077266</b> | 243  | 0.21 | 0.53 | 0.32 | 0.83 | 19.62 | 1.00 | 761.28  |
| <b>Aam078199</b> | 221  | 0.86 | 3.10 | 2.24 | 0.85 | 16.96 | 1.00 | 728.26  |
|                  | 457  | 0.57 | 1.65 | 1.07 | 0.84 | 16.37 | 1.00 | 1010.37 |
|                  | 478  | 1.12 | 3.85 | 2.73 | 0.82 | 14.42 | 1.00 | 848.17  |
| <b>Aam078452</b> | 29   | 0.77 | 2.66 | 1.88 | 0.82 | 14.40 | 1.00 | 623.45  |
| <b>Aam079585</b> | 266  | 0.72 | 2.22 | 1.50 | 0.81 | 8.09  | 1.00 | 995.15  |
|                  | 321  | 0.70 | 2.41 | 1.71 | 0.84 | 10.25 | 1.00 | 1040.6  |

|                  |     |      |      |      |      |       |      |         |
|------------------|-----|------|------|------|------|-------|------|---------|
|                  |     |      |      |      |      |       |      | 6       |
| <b>Aam079965</b> | 164 | 0.62 | 1.89 | 1.27 | 0.81 | 7.02  | 1.00 | 819.12  |
|                  | 175 | 0.65 | 1.91 | 1.26 | 0.81 | 6.77  | 1.00 | 748.94  |
|                  | 176 | 0.64 | 1.63 | 1.00 | 0.80 | 6.63  | 1.00 | 829.72  |
|                  | 238 | 0.95 | 3.24 | 2.29 | 0.80 | 6.53  | 1.00 | 696.07  |
|                  | 246 | 1.02 | 3.56 | 2.54 | 0.81 | 7.15  | 1.00 | 686.44  |
|                  | 264 | 0.64 | 2.38 | 1.75 | 0.86 | 10.11 | 1.00 | 778.06  |
|                  | 265 | 0.39 | 1.32 | 0.93 | 0.86 | 10.02 | 1.00 | 740.61  |
|                  | 303 | 0.43 | 1.60 | 1.17 | 0.86 | 10.20 | 1.00 | 882.03  |
|                  | 305 | 0.28 | 0.68 | 0.41 | 0.82 | 7.29  | 1.00 | 663.79  |
|                  | 331 | 0.24 | 0.63 | 0.39 | 0.84 | 8.76  | 1.00 | 643.08  |
| <b>Aam081307</b> | 2   | 0.20 | 0.50 | 0.30 | 0.81 | 13.37 | 1.00 | 755.29  |
|                  | 12  | 0.10 | 0.22 | 0.11 | 0.81 | 12.89 | 1.00 | 567.95  |
|                  | 75  | 1.10 | 3.59 | 2.48 | 0.80 | 12.46 | 1.00 | 817.15  |
|                  | 84  | 0.70 | 2.32 | 1.63 | 0.81 | 13.01 | 1.00 | 844.97  |
| <b>Aam081496</b> | 19  | 0.51 | 2.02 | 1.51 | 0.83 | 16.11 | 1.00 | 953.62  |
|                  | 25  | 0.54 | 1.61 | 1.06 | 0.81 | 14.66 | 1.00 | 847.66  |
|                  | 558 | 0.70 | 2.48 | 1.79 | 0.84 | 17.30 | 1.00 | 1105.49 |
|                  | 936 | 0.89 | 3.19 | 2.30 | 0.83 | 15.94 | 1.00 | 1174.83 |
| <b>Aam081889</b> | NO  |      |      |      |      |       |      |         |
| <b>Aam082363</b> | NO  |      |      |      |      |       |      |         |
| <b>Aam082779</b> | 224 | 0.64 | 2.52 | 1.88 | 0.86 | 18.81 | 1.00 | 1052.90 |
|                  | 225 | 0.99 | 3.50 | 2.50 | 0.82 | 13.16 | 1.00 | 1148.16 |
|                  | 228 | 0.70 | 2.29 | 1.59 | 0.82 | 13.32 | 1.00 | 904.02  |
|                  | 346 | 0.77 | 2.35 | 1.57 | 0.81 | 12.34 | 1.00 | 852.87  |
|                  | 351 | 0.48 | 1.65 | 1.17 | 0.86 | 18.28 | 1.00 | 739.98  |
|                  | 638 | 0.61 | 1.90 | 1.30 | 0.81 | 12.66 | 1.00 | 826.16  |
|                  | 733 | 0.94 | 3.19 | 2.25 | 0.82 | 13.19 | 1.00 | 1123.71 |
|                  | 990 | 0.74 | 2.29 | 1.55 | 0.81 | 12.64 | 1.00 | 855.01  |
| <b>Aam083292</b> | NO  |      |      |      |      |       |      |         |
| <b>Aam083376</b> | 170 | 0.12 | 0.26 | 0.14 | 0.85 | 11.26 | 1.01 | 428.38  |
|                  | 543 | 0.67 | 2.01 | 1.33 | 0.80 | 7.85  | 1.00 | 1174.67 |
|                  | 550 | 0.67 | 1.96 | 1.29 | 0.81 | 8.24  | 1.00 | 1166.15 |
| <b>Aam083451</b> | 212 | 0.77 | 3.13 | 2.36 | 0.87 | 15.36 | 1.00 | 1790.42 |
|                  | 231 | 0.52 | 2.04 | 1.51 | 0.87 | 15.13 | 1.00 | 823.62  |
|                  | 441 | 1.04 | 3.46 | 2.43 | 0.82 | 10.68 | 1.00 | 1963.8  |



|                  |      |      |      |      |      |       |      |         |
|------------------|------|------|------|------|------|-------|------|---------|
|                  | 49   | 0.17 | 0.46 | 0.29 | 0.81 | 15.64 | 1.00 | 1089.58 |
|                  | 221  | 0.87 | 3.10 | 2.24 | 0.82 | 16.10 | 1.00 | 709.12  |
|                  | 453  | 0.33 | 1.21 | 0.88 | 0.87 | 23.97 | 1.00 | 741.87  |
|                  | 572  | 0.19 | 0.62 | 0.42 | 0.86 | 21.10 | 1.00 | 1012.03 |
| <b>Aam087037</b> | NO   |      |      |      |      |       |      |         |
| <b>Aam087428</b> | 50   | 0.20 | 0.87 | 0.67 | 0.89 | 23.71 | 1.00 | 825.75  |
| <b>Aam087461</b> | 201  | 0.24 | 0.56 | 0.32 | 0.83 | 10.21 | 1.01 | 369.99  |
|                  | 525  | 0.10 | 0.20 | 0.10 | 0.82 | 9.52  | 1.01 | 336.76  |
| <b>Aam087490</b> | NO   |      |      |      |      |       |      |         |
| <b>Aam087513</b> | NO   |      |      |      |      |       |      |         |
| <b>Aam087837</b> | 2250 | 0.84 | 2.98 | 2.14 | 0.81 | 15.37 | 1.00 | 669.13  |
|                  | 2251 | 0.56 | 1.89 | 1.33 | 0.82 | 16.03 | 1.00 | 748.36  |
| <b>Aam087989</b> | 481  | 0.36 | 0.79 | 0.43 | 0.82 | 8.83  | 1.00 | 725.67  |
| <b>Aam088035</b> | NO   |      |      |      |      |       |      |         |
| <b>Aam088045</b> | 254  | 0.70 | 2.46 | 1.76 | 0.84 | 8.47  | 1.01 | 386.46  |
|                  | 280  | 0.45 | 1.36 | 0.91 | 0.83 | 7.94  | 1.01 | 306.59  |
|                  | 332  | 0.76 | 2.76 | 2.00 | 0.84 | 8.95  | 1.01 | 383.99  |
| <b>Aam088209</b> | 111  | 1.07 | 3.59 | 2.52 | 0.80 | 9.75  | 1.00 | 702.43  |
| <b>Aam088351</b> | NO   |      |      |      |      |       |      |         |
| <b>Aam088368</b> | NO   |      |      |      |      |       |      |         |
| <b>Aam088382</b> | 528  | 0.57 | 2.06 | 1.49 | 0.83 | 23.51 | 1.00 | 633.41  |
|                  | 1855 | 1.01 | 3.93 | 2.92 | 0.84 | 24.59 | 1.01 | 462.03  |
| <b>Aam322360</b> | 86   | 0.76 | 2.21 | 1.45 | 0.82 | 9.02  | 1.00 | 1795.84 |
|                  | 186  | 0.71 | 2.58 | 1.87 | 0.84 | 10.20 | 1.00 | 1451.17 |
|                  | 206  | 1.02 | 3.58 | 2.56 | 0.82 | 9.12  | 1.00 | 1180.30 |
|                  | 220  | 0.86 | 2.99 | 2.13 | 0.82 | 9.37  | 1.00 | 1576.32 |
| <b>Aam324992</b> | 12   | 0.97 | 3.52 | 2.55 | 0.82 | 7.97  | 1.00 | 959.41  |
|                  | 16   | 0.23 | 0.60 | 0.38 | 0.84 | 9.38  | 1.00 | 537.60  |
|                  | 44   | 0.79 | 2.53 | 1.74 | 0.81 | 7.46  | 1.00 | 1013.66 |
|                  | 90   | 0.84 | 2.89 | 2.05 | 0.83 | 8.46  | 1.00 | 757.72  |
| <b>Aam325436</b> | 101  | 0.99 | 3.39 | 2.40 | 0.80 | 11.09 | 1.01 | 427.63  |
|                  | 174  | 0.20 | 0.58 | 0.38 | 0.85 | 15.18 | 1.01 | 419.79  |
|                  | 557  | 0.78 | 2.72 | 1.94 | 0.81 | 11.99 | 1.01 | 411.57  |
|                  | 669  | 0.75 | 2.57 | 1.82 | 0.82 | 12.50 | 1.01 | 408.06  |
|                  | 793  | 0.63 | 2.27 | 1.64 | 0.84 | 13.98 | 1.01 | 379.95  |
| <b>Aam327516</b> | 4    | 0.11 | 0.21 | 0.10 | 0.85 | 8.61  | 1.00 | 1957.29 |

|                  |     |      |      |      |      |       |      |         |
|------------------|-----|------|------|------|------|-------|------|---------|
|                  | 10  | 1.00 | 3.30 | 2.29 | 0.81 | 6.79  | 1.00 | 1183.03 |
|                  | 20  | 0.95 | 3.39 | 2.44 | 0.82 | 7.11  | 1.00 | 1319.82 |
|                  | 41  | 0.44 | 1.70 | 1.26 | 0.88 | 11.05 | 1.00 | 779.99  |
|                  | 44  | 0.22 | 0.38 | 0.16 | 0.80 | 6.20  | 1.00 | 850.07  |
|                  | 45  | 0.12 | 0.29 | 0.17 | 0.85 | 8.69  | 1.00 | 1415.29 |
|                  | 46  | 0.17 | 0.52 | 0.34 | 0.84 | 7.96  | 1.00 | 1122.83 |
|                  | 92  | 0.80 | 2.70 | 1.90 | 0.84 | 7.94  | 1.00 | 1154.76 |
| <b>Aam332970</b> | 78  | 0.28 | 0.60 | 0.32 | 0.82 | 8.38  | 1.00 | 1924.97 |
| <b>Aam349697</b> | 83  | 0.23 | 0.79 | 0.56 | 0.87 | 31.33 | 1.00 | 1412.89 |
|                  | 88  | 0.17 | 0.43 | 0.26 | 0.83 | 21.72 | 1.00 | 1746.00 |
|                  | 475 | 0.86 | 3.18 | 2.32 | 0.85 | 25.24 | 1.00 | 768.33  |
| <b>Aam357923</b> | 119 | 0.67 | 2.22 | 1.55 | 0.81 | 17.78 | 1.00 | 1468.64 |
