# Supplementary material for: Diel rewiring and positive selection of ancient plant proteins enabled evolution of CAM photosynthesis in Agave
Source: PubMed Central journal article supplement (PMC6090859; doi:10.1186/s12864-018-4964-7), 2018-08-06
Supplement: 12864_2018_4964_MOESM14_ESM.pdf [file 12864_2018_4964_MOESM14_ESM.pdf]

**Table S11.** List of *Agave americana* genes with morning-to-night shift in expression pattern as compared with the orthologous genes in *Arabidopsis*.

| <i>Agave</i> gene | <i>Arabidopsis</i> gene | Function category                       | Definition                                           | Ortholog clade |
|-------------------|-------------------------|-----------------------------------------|------------------------------------------------------|----------------|
| Aam073900         | AT5G05270               | Anthocyanin biosynthetic process        | Chalcone-flavanone isomerase family protein          | NVP:C3:CAM:C4  |
| Aam003740         | AT5G54130               | Calcium binding                         | Calcium-binding endonuclease/exonuclease/phosphatase | NVP:C3:CAM:C4  |
| Aam022373         | AT5G17300               | Circadian-output                        | Reveille 1 (rve1)                                    | C3:CAM:C4      |
| Aam340116         | AT5G64460               | Cytokinin pathway                       | Phosphoglycerate mutase family protein               | NVP:C3:CAM:C4  |
| Aam013303         | AT1G10740               | Glycerol biosynthetic process           | Alpha/beta-Hydrolases superfamily protein            | NVP:C3:CAM:C4  |
| Aam086075         | AT1G44446               | Photosynthesis-chlorophyll biosynthesis | Pheophorbide a oxygenase family protein              | NVP:C3:CAM:C4  |
| Aam010047         | AT1G64770               | Photosynthesis-PET                      | NDH-dependent cyclic electron flow 1; NDF2           | C3:CAM:C4      |
| Aam084849         | AT4G29950               | RAB gtpase activator                    | Ypt/Rab-GAP domain of gyp1p superfamily protein      | NVP:C3:CAM:C4  |
| Aam291140         | AT5G18600               | Redox homeostasis                       | Thioredoxin superfamily protein                      | NVP:C3:CAM:C4  |
| Aam027379         | AT3G50980               | Stress responsive                       | Dehydrin xero 1 (XERO1)                              | C3:CAM         |
| Aam054885         | AT5G42760               | Stress responsive                       | Leucine carboxyl methyltransferase                   | NVP:C3:CAM:C4  |
| Aam011975         | AT1G75500               | Transporter                             | Walls are thin 1 (wat1)                              | NVP:C3:CAM:C4  |
| Aam043718         | AT5G47560               | Transporter (malate)                    | Tonoplast dicarboxylate transporter (TDT)            | NVP:C3:CAM:C4  |
| Aam018832         | AT4G22200               | Transporter (Stomatal movement)         | Potassium transport 2/3                              | NVP:C3:CAM:C4  |
| Aam003354         | AT2G15020               | Unknown                                 | Unknown protein                                      | C3:CAM:C4      |
| Aam004076         | AT4G24700               | Unknown                                 | Unknown protein                                      | C3:CAM:C4      |
| Aam017052         | AT3G15810               | Unknown                                 | Protein of unknown function (DUF567)                 | C3:CAM:C4      |
| Aam048214         | AT1G21000               | Unknown                                 | PLATZ transcription factor family protein            | NVP:C3:CAM:C4  |
| Aam086795         | AT1G22930               | Unknown                                 | T-complex protein 11                                 | NVP:C3:CAM:C4  |
| Aam313665         | AT5G55570               | Unknown                                 | Unknown protein                                      | NVP:C3:CAM:C4  |
| Aam328864         | AT3G29240               | Unknown                                 | Protein of unknown function (DUF179)                 | NVP:C3:CAM:C4  |
| Aam336929         | AT1G15230               | Unknown                                 | Unknown protein                                      | NVP:C3:CAM     |
