# Supplementary material for: Diel rewiring and positive selection of ancient plant proteins enabled evolution of CAM photosynthesis in Agave
Source: PubMed Central journal article supplement (PMC6090859; doi:10.1186/s12864-018-4964-7), 2018-08-06
Supplement: 12864_2018_4964_MOESM15_ESM.pdf [file 12864_2018_4964_MOESM15_ESM.pdf]

**Table S12.** List of *Agave americana* genes with afternoon-to-night shift in expression pattern as compared with the orthologous genes in *Arabidopsis*.

| <i>Agave</i> gene | <i>Arabidopsis</i> gene | Function category                 | Definition                                               | Ortholog clade |
|-------------------|-------------------------|-----------------------------------|----------------------------------------------------------|----------------|
| Aam007668         | AT2G38050               | Brassinosteroid pathway           | 3-oxo-5-alpha-steroid 4-dehydrogenase; DE-ETIOLATED 2    | NVP:C3:CAM:C4  |
| Aam043341         | AT4G24210               | Gibberellin pathway               | F-box family protein; SLEEPY1 (SLY1)                     | NVP:C3:CAM:C4  |
| Aam328824         | AT1G47830               | Intracellular protein transport   | SNARE-like superfamily protein                           | NVP:C3:CAM:C4  |
| Aam008820         | AT2G02400               | Lignin biosynthesis               | NAD(P)-binding Rossmann-fold superfamily protein         | C3:CAM         |
| Aam007892         | AT1G62040               | Phosphatidylinositol biosynthesis | Ubiquitin-like superfamily protein                       | NVP:C3:CAM:C4  |
| Aam014937         | AT1G54210               | Phosphatidylinositol biosynthesis | Ubiquitin-like superfamily protein                       | NVP:C3:CAM:C4  |
| Aam049417         | AT3G61470               | Photosynthesis - antenna          | Photosystem I light harvesting complex gene 2 (LHCA2)    | NVP:C3:CAM:C4  |
| Aam015317         | AT1G08380               | Photosynthesis-PET                | Photosystem I subunit O                                  | NVP:C3:CAM:C4  |
| Aam008410         | AT4G21105               | Redox homeostasis                 | Cytochrome-c oxidases;electron carriers                  | C3:CAM:C4      |
| Aam019477         | AT5G60860               | Small gtpase                      | RAB gtpase homolog A1F (RABA1f)                          | NVP:C3:CAM:C4  |
| Aam076638         | AT5G47120               | Stress responsive                 | BAX inhibitor 1 (BI1)                                    | NVP:C3:CAM:C4  |
| Aam309984         | AT2G46330               | Sugar metabolic pathway           | Arabinogalactan protein 16 (AGP16)                       | NVP:C3:CAM:C4  |
| Aam312763         | AT5G14910               | Transporter                       | Heavy metal transport/detoxification superfamily protein | NVP:C3:CAM:C4  |
| Aam012414         | AT1G56260               | Unknown                           | Unknown protein                                          | NVP:C3:CAM:C4  |
| Aam016072         | AT5G37480               | Unknown                           | Unknown protein                                          | NVP:C3:CAM:C4  |
| Aam017752         | AT1G72170               | Unknown                           | Domain of unknown function (duf543)                      | NVP:C3:CAM:C4  |
| Aam047120         | AT4G20150               | Unknown                           | Unknown protein                                          | NVP:C3:CAM:C4  |
| Aam073509         | AT1G65900               | Unknown                           | Unknown protein                                          | NVP:C3:CAM:C4  |
| Aam287556         | AT5G63905               | Unknown                           | Unknown protein                                          | C3:CAM:C4      |
| Aam321654         | AT1G27290               | Unknown                           | Unknown protein                                          | C3:CAM:C4      |
