# Supplementary material for: Diel rewiring and positive selection of ancient plant proteins enabled evolution of CAM photosynthesis in Agave
Source: PubMed Central journal article supplement (PMC6090859; doi:10.1186/s12864-018-4964-7), 2018-08-06
Supplement: 12864_2018_4964_MOESM16_ESM.pdf [file 12864_2018_4964_MOESM16_ESM.pdf]

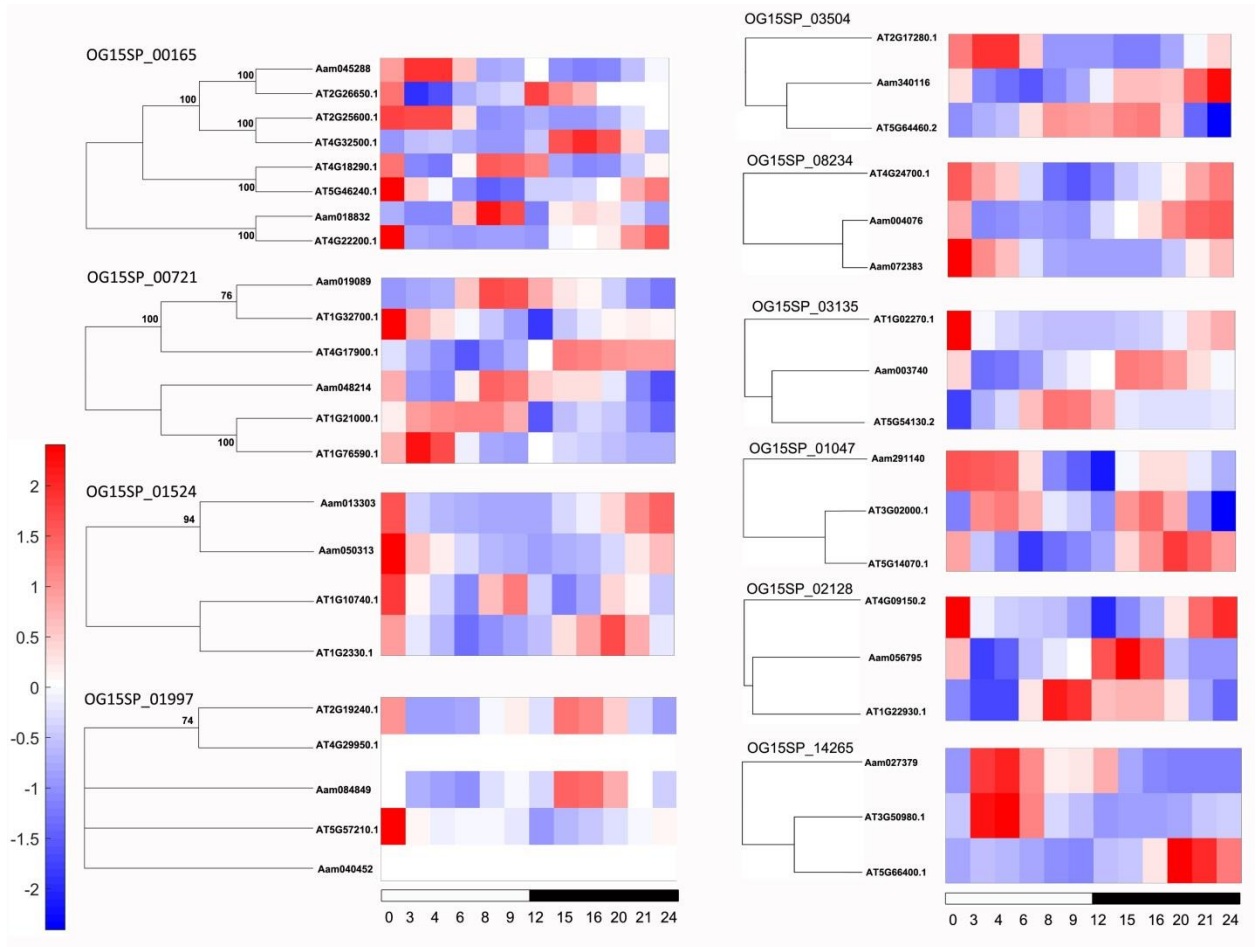

**Figure S4.** Phylogenetic trees and diel gene expression patterns of multi-gene ortholog groups (i.e., with a total of more than two *Agave* and *Arabidopsis* genes) listed Figure 4a. The z-score normalized expression patterns were plotted by heatmaps. The blank rows indicate no gene expression detected by transcriptome-sequencing. White and black bars indicate daytime (12-hour) and nighttime (12-hour), respectively.
