# Supplementary material for: Diel rewiring and positive selection of ancient plant proteins enabled evolution of CAM photosynthesis in Agave
Source: PubMed Central journal article supplement (PMC6090859; doi:10.1186/s12864-018-4964-7), 2018-08-06
Supplement: 12864_2018_4964_MOESM19_ESM.pdf [file 12864_2018_4964_MOESM19_ESM.pdf]

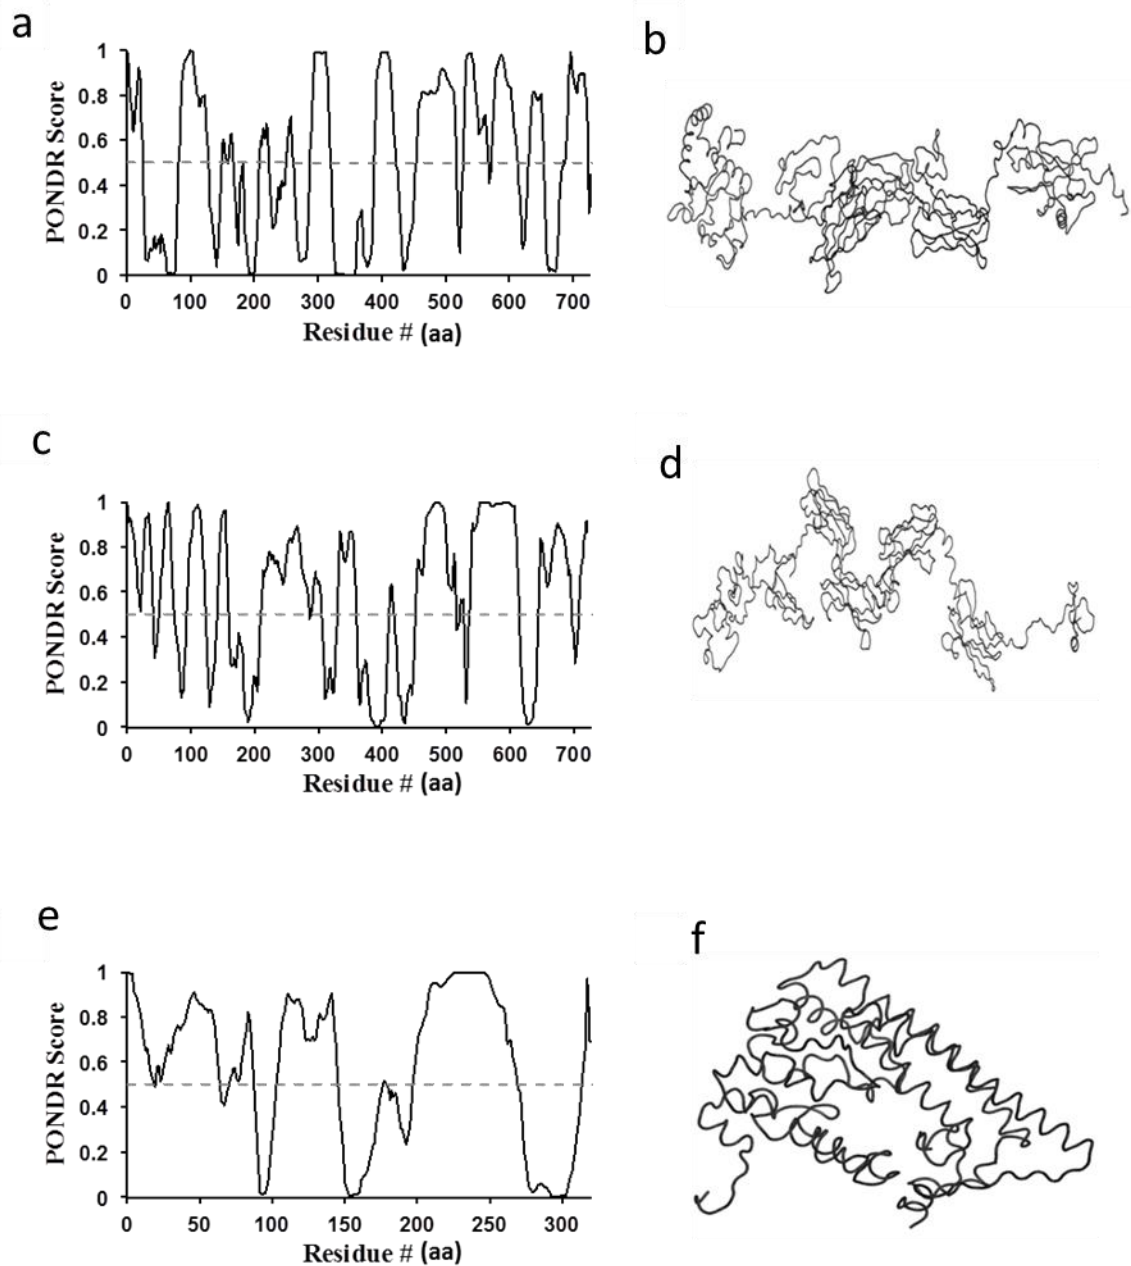

**Figure S6.** Intrinsically disordered protein regions (IDPRs) and structural models of the circadian clock proteins in *Agave americana*. **(a)** POND-scores profile of LATE ELONGATED HYPOCOTYL (LHY, Aam006353); **(b)** structural model of LHY; **(c)** POND-scores profile of EARLY FLOWERING 3 (ELF3, Aam085988), **(d)** structural model of ELF3, **(e)** POND-scores profile of LUX ARRHYTHMO (LUX, Aam048752), and **(f)** structural model of LUX.
