# Supplementary material for: Diel rewiring and positive selection of ancient plant proteins enabled evolution of CAM photosynthesis in Agave
Source: PubMed Central journal article supplement (PMC6090859; doi:10.1186/s12864-018-4964-7), 2018-08-06
Supplement: 12864_2018_4964_MOESM20_ESM.pdf [file 12864_2018_4964_MOESM20_ESM.pdf]

**Table S14.** Intrinsically disordered protein region (IDPR) in protein sequences under positive selection.

| Gene ID   | Gene name | Protein sequence length (aa) | Longest IDPR | R <sub>dis</sub> * | SPONDR** |
|-----------|-----------|------------------------------|--------------|--------------------|----------|
| Aam088315 | GAUT7     | 654                          | N113-E173    | 0.200              | 0.277    |
| Aam049326 | CT-BMY    | 544                          | N21-N40      | 0.193              | 0.294    |
| Aam082045 | SS2       | 646                          | V57-Q150     | 0.361              | 0.343    |
| Aam048341 | PPCK1     | 280                          | P237-A257    | 0.186              | 0.290    |
| Aam051010 | PPDK-RP   | 421                          | N87-A153     | 0.508              | 0.497    |
| Aam002877 | PsaD2     | 244                          | D83-G118     | 0.385              | 0.412    |
| Aam085988 | ELF3      | 720                          | G536-N613    | 0.638              | 0.589    |
| Aam048752 | LUX       | 320                          | M197-V268    | 0.634              | 0.576    |
| Aam006353 | LHY       | 727                          | V453-G516    | 0.534              | 0.513    |

\*Ratio of disordered residues.

\*\*The average PONDR VL-XT score of the entire protein.
